# Supplementary material for: Antibacterial and Anti-Quorum Sensing Properties of Silver Nanoparticles Phytosynthesized Using Embelia ruminata
Source: MDPI journal article supplement (doi:10.3390/plants13020168), 2024-01-08
Supplement: s1 [file s1]

Supplementary Materials

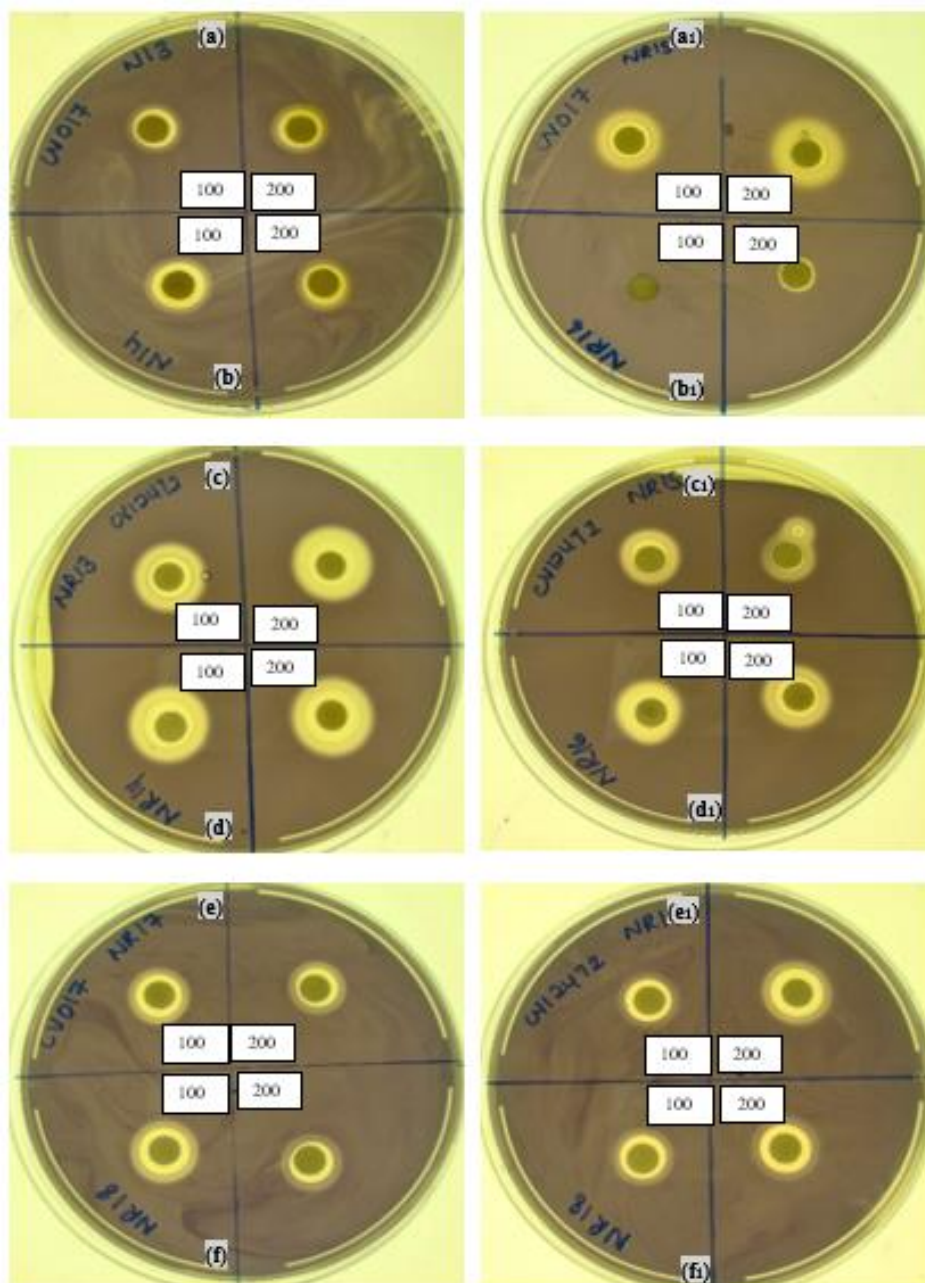

**Figure S1.** Inhibitory effects of silver nanoparticles (AgNPs) biosynthesized using aqueous extracts of *Embelia ruminata* on violacein production by *Chromobacterium subsugae* CV017 and *Chromobacterium violaceum* ATCC 12472. Labels (a) and (a<sub>1</sub>) = Leaf Rt, (b) and (b<sub>1</sub>) = Leaf 80 °C, (c) and (c<sub>1</sub>) = Stem-bark Rt, (d) and (d<sub>1</sub>) = Stem-bark 80 °C, (e) and (e<sub>1</sub>) = Fruit Rt, (f) and (f<sub>1</sub>) = Fruit 80 °C using biosensors CV017 and ATCC 12472, respectively.
